# Supplementary material
Source: publisher figshare collection journal article supplement (https://acs.figshare.com/ndownloader/files/4553995)

**Alteration of Molecular Conformations, Coordination Modes and Architectures for a Novel 3,8-Diimidazol-1,10-phenanthroline Compound in the Construction of Cadmium(II) and Zinc(II) Homochiral Coordination Polymers Involving an Auxiliary Chiral Camphorate Ligand**

**Li Wang, Wei You, Wei Huang, Cheng Wang, Xiao-Zeng You**

*State Key Laboratory of Coordination Chemistry, Nanjing National Laboratory of Microstructures, School of Chemistry and Chemical Engineering, Nanjing University, Nanjing 210093, P. R. China*

**Figure S1.** The simulative (red line) and experimental (black line) powder X-ray diffraction patterns for complexes **3-5** at room temperature.

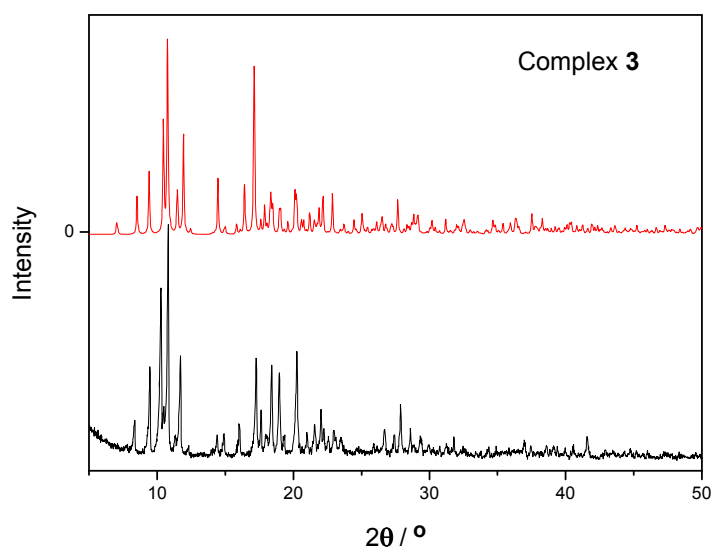

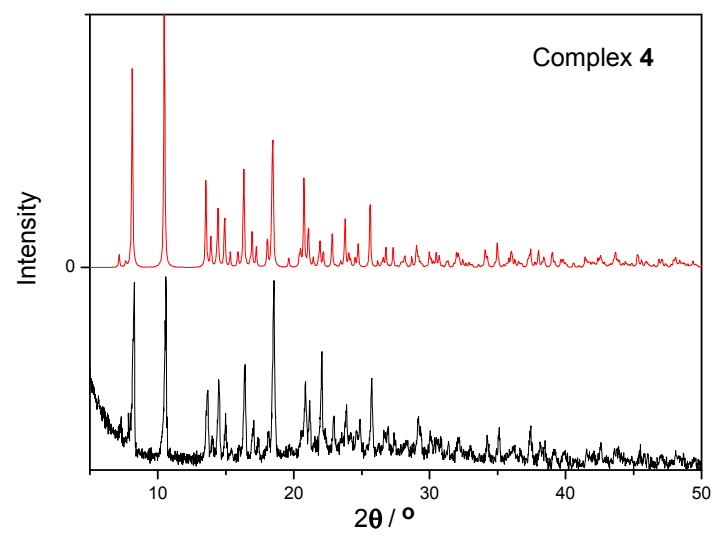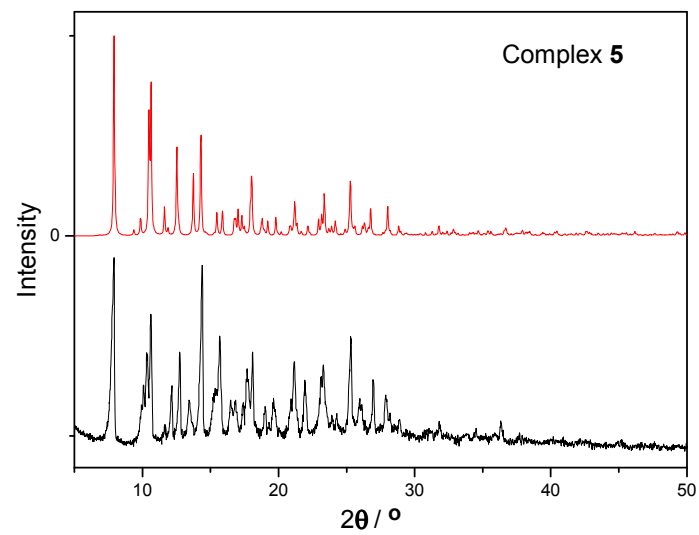

Supplement: Supplementary file 1 [file 4553995]
